# Supplementary material
Source: PubMed Central journal article supplement (PMC2805832)
Supplement: NIHMS155339-supplement-figure_tables.pdf [file NIHMS155339-supplement-figure_tables.pdf]

## Supplementary Material

Supplementary material includes:

1. Figure SM1
2. Table SM1
3. A zip file with 64 models of A2a ligands presented in Table SM1.

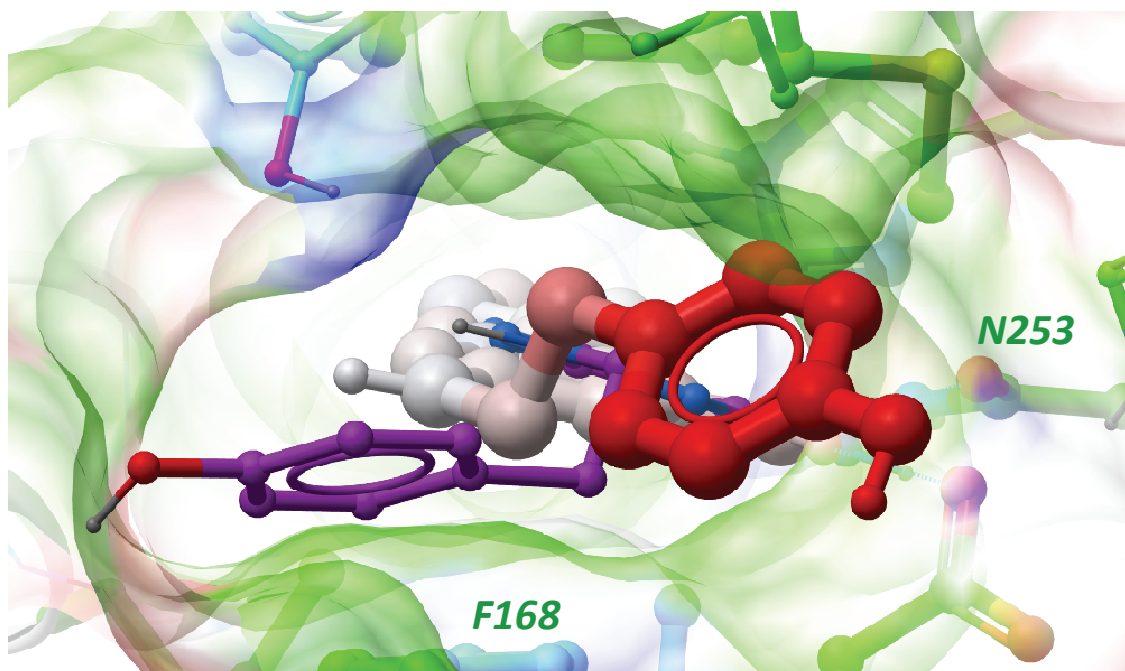

**Figure SM1.** An extracellular view on alternative (magenta) best scoring conformation of ZMA ligand docked by ICM into the crystal structure of AA2AR. The ligand conformation from 3EML PDB file is colored according to its B-factor, where red represent B-factor > 100 Å<sup>2</sup>. Phenoxy moiety of ZMA is in foreground. The pocket of the receptor is shown as transparent skin, colored according to surface properties (green - hydrophobic, blue - donor, red - acceptor of hydrogen bonds.)

**Table SM1.** AA2AR binding ligands from ref. (Cacciari et al, [Purinergic Signal.](#) 2007 3(3):183-93) and (Michaelan et al *J. Chem. Inf. Model.*, 2008, 48 (2), 350-363). Predicted ICM binding score in mod2upu model is shown for each ligand. Corresponding binding poses can be found in the pdb files attached.

|                                                                                                                              |                                                                                                                             |                                                                                                                               |                                                                                                                                |
|------------------------------------------------------------------------------------------------------------------------------|-----------------------------------------------------------------------------------------------------------------------------|-------------------------------------------------------------------------------------------------------------------------------|--------------------------------------------------------------------------------------------------------------------------------|
| 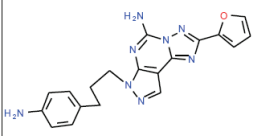 <p>NAME cacc_13_a2a<br/>Score -46.79</p>   |  <p>NAME mich_5_a2a<br/>Score -45.43</p>   |  <p>NAME cacc_9_a2a<br/>Score -44.52</p>     |  <p>NAME mich_2_a2a<br/>Score -43.58</p>     |
|  <p>NAME cacc_8_a2a<br/>Score -43.46</p>    |  <p>NAME mich_6_a2a<br/>Score -42.73</p>   |  <p>NAME cacc_3_a2a<br/>Score -42.63</p>     |  <p>NAME mich_89_a2a<br/>Score -41.7</p>     |
|  <p>NAME cacc_6_a2a<br/>Score -41.11</p>    |  <p>NAME mich_17_a2a<br/>Score -41.06</p>  |  <p>NAME cacc_14_a2a<br/>Score -40.76</p>    |  <p>NAME mich_3_a2a<br/>Score -40.46</p>     |
|  <p>NAME cacc_7_a2a<br/>Score -40.3</p>    |  <p>NAME cacc_26_a2a<br/>Score -40.1</p>  |  <p>NAME mich_88_a2a<br/>Score -39.51</p>   |  <p>NAME cacc_5_a2a<br/>Score -39.31</p>    |
|  <p>NAME cacc_10_a2a<br/>Score -39.1</p>  |  <p>NAME mich_8_a2a<br/>Score -39.07</p> |  <p>NAME mich_16_a2a<br/>Score -38.76</p>  |  <p>NAME mich_111_a2a<br/>Score -37.65</p> |
|  <p>NAME mich_124<br/>Score -37.52</p>    |  <p>NAME mich_9_a2a<br/>Score -37.28</p> |  <p>NAME mich_100_a2a<br/>Score -36.74</p> |  <p>NAME mich_123_a2a<br/>Score -36.25</p> |
|  <p>NAME mich_91_a2a<br/>Score -35.59</p> |  <p>NAME mich_99<br/>Score -35.09</p>    |  <p>NAME cacc_4_a2a<br/>Score -34.93</p>   |  <p>NAME mich_122<br/>Score -34.23</p>     |
|  <p>NAME mich_12_a2a<br/>Score -33.26</p> |  <p>NAME mich_7_a2a<br/>Score -33.04</p> |  <p>NAME mich_108<br/>Score -32.86</p>     |  <p>NAME mich_98<br/>Score -32.3</p>       |

|                                                                                                                               |                                                                                                                           |                                                                                                                               |                                                                                                                                   |
|-------------------------------------------------------------------------------------------------------------------------------|---------------------------------------------------------------------------------------------------------------------------|-------------------------------------------------------------------------------------------------------------------------------|-----------------------------------------------------------------------------------------------------------------------------------|
| 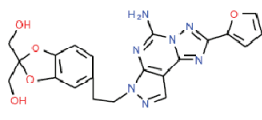 <p>NAME mich_19_a2a<br/>Score -31.93</p>    |  <p>NAME cacc_11_a2a<br/>Score -31.6</p> |  <p>NAME mich_13_a2a<br/>Score -31.34</p>   |  <p>NAME mich_112_a2a<br/>Score -26.41</p>     |
|  <p>NAME mich_104<br/>Score -25.74</p>       |  <p>NAME mich_97<br/>Score -25.02</p>    |  <p>NAME cacc_2_a2a<br/>Score -24.91</p>    |  <p>NAME mich_110_a2a<br/>Score -24.79</p>     |
|  <p>NAME mich_103_a2a<br/>Score -24.62</p>   |  <p>NAME mich_102<br/>Score -24.3</p>    |  <p>NAME mich_1_a2a<br/>Score -24.27</p>    |  <p>NAME mich_106<br/>Score -23.69</p>         |
|  <p>NAME mich_87_a2a<br/>Score -20.85</p>    |  <p>NAME mich_107<br/>Score -20.14</p>   |  <p>NAME cacc_25<br/>Score -19.67</p>       |  <p>NAME mich_86_a2a<br/>Score -18.66</p>      |
|  <p>NAME mich_101<br/>Score -17.3</p>       |  <p>NAME mich_34<br/>Score -16.96</p>   |  <p>NAME cacc_27<br/>Score -16.35</p>      |  <p>NAME mich_92_a2a<br/>Score -15.47</p>     |
|  <p>NAME cacc_30_a2a<br/>Score -13.5</p>   |  <p>NAME mich_93<br/>Score -13.44</p>  |  <p>NAME mich_4_a2a<br/>Score -12.97</p>  |  <p>NAME mich_14<br/>Score -12.69</p>        |
|  <p>NAME mich_94_a2a<br/>Score -12.56</p>  |  <p>NAME mich_95<br/>Score -11.62</p>  |  <p>NAME cacc_23_a2a<br/>Score -9.373</p> |  <p>NAME cacc_16_a2a_a3<br/>Score -9.087</p> |
|  <p>NAME mich_109_a2a<br/>Score -4.608</p> |  <p>NAME cacc_24<br/>Score -3.101</p>  |  <p>NAME mich_10_a2a<br/>Score 3.71</p>   |  <p>NAME mich_11_a2a<br/>Score 20.81</p>     |
